# Supplementary material for: Comprehensive Analysis of Risk Factors for Periodontitis Focusing on the Saliva Microbiome and Polymorphism
Source: MDPI journal article supplement (doi:10.3390/ijerph18126430), 2021-06-14
Supplement: s1 [file s1]

Table S1. Difference in genotypic frequencies between periodontitis and control groups.

| Gene    | SNPs       | Gene polymorphisms | Periodontitis         | Control         | p <sup>a</sup> |
|---------|------------|--------------------|-----------------------|-----------------|----------------|
|         |            |                    | group<br>n = 11       | group<br>n = 11 |                |
| KCNQ5   | rs9446777  | AA                 | 8 (72.7) <sup>b</sup> | 7 (63.6)        | 0.587          |
|         |            | AG                 | 3 (27.3)              | 3 (27.3)        |                |
|         |            | GG                 | 0 (0.0)               | 1 (9.1)         |                |
| TENM2   | rs4242220  | TT                 | 7 (63.6)              | 8 (72.7)        | 0.420          |
|         |            | TG                 | 4 (36.4)              | 2 (18.2)        |                |
|         |            | GG                 | 0 (0.0)               | 1 (9.1)         |                |
| NPY     | rs2521634  | GG                 | 6 (54.5)              | 9 (81.8)        | 0.118          |
|         |            | AG                 | 5 (45.5)              | 1 (9.1)         |                |
|         |            | AA                 | 0 (0.0)               | 1 (9.1)         |                |
| ADGRE1  | rs3826782  | GG                 | 4 (36.4)              | 6 (54.5)        | 0.392          |
|         |            | GA                 | 7 (63.6)              | 5 (45.5)        |                |
|         |            | AA                 | 0 (0.0)               | 0 (0.0)         |                |
| TRA     | rs3811273  | AA                 | 4 (36.4)              | 8 (72.7)        | 0.147          |
|         |            | AG                 | 5 (45.5)              | 3 (27.3)        |                |
|         |            | GG                 | 2 (18.2)              | 0 (0.0)         |                |
| C1QTNF7 | rs4074082  | TT                 | 10 (90.9)             | 8 (72.7)        | 0.586          |
|         |            | TC                 | 1 (9.1)               | 3 (27.3)        |                |
|         |            | CC                 | 0 (0.0)               | 0 (0.0)         |                |
| TSNARE  | rs9772881  | AA                 | 7 (63.6)              | 10 (90.9)       | 0.282          |
|         |            | GA                 | 3 (27.3)              | 1 (9.1)         |                |
|         |            | GG                 | 1 (9.1)               | 0 (0.0)         |                |
| HPVC1   | rs10232172 | GG                 | 9 (81.8)              | 9 (81.8)        | 1.000          |
|         |            | GT                 | 2 (18.2)              | 2 (18.2)        |                |
|         |            | TT                 | 0 (0.0)               | 0 (0.0)         |                |
| PKP2    | rs6488099  | AA                 | 11 (100)              | 11 (100)        | NA             |
|         |            | AG                 | 0 (0.0)               | 0 (0.0)         |                |
|         |            | GG                 | 0 (0.0)               | 0 (0.0)         |                |
| FHOD3   | rs8094794  | CC                 | 7 (63.6)              | 9 (81.8)        | 0.635          |
|         |            | CT                 | 4 (36.4)              | 2 (18.2)        |                |
|         |            | TT                 | 0 (0.0)               | 0 (0.0)         |                |
| RF00026 | rs733048   | GG                 | 4 (36.4)              | 4 (36.4)        | 0.856          |
|         |            | AG                 | 5 (45.5)              | 4 (36.4)        |                |
|         |            | AA                 | 2 (18.2)              | 3 (27.3)        |                |

|                |            |    |           |           |       |
|----------------|------------|----|-----------|-----------|-------|
| CDKL1          | rs3783412  | GG | 4 (36.4)  | 1 (9.1)   | 0.141 |
|                |            | AG | 5 (45.5)  | 4 (36.4)  |       |
|                |            | AA | 2 (18.2)  | 6 (54.5)  |       |
| FBXO38         | rs10043775 | TT | 8 (72.7)  | 7 (63.6)  | 0.875 |
|                |            | CT | 2 (18.2)  | 3 (27.3)  |       |
|                |            | CC | 1 (9.1)   | 1 (9.1)   |       |
| TBC1D1         | rs10010758 | TT | 8 (72.7)  | 7 (63.6)  | 0.875 |
|                |            | CT | 2 (18.2)  | 3 (27.3)  |       |
|                |            | CC | 1 (9.1)   | 1 (9.1)   |       |
| TENM2          | rs6885116  | AA | 10 (90.9) | 8 (72.7)  | 0.586 |
|                |            | AG | 1 (9.1)   | 3 (27.3)  |       |
|                |            | GG | 0 (0.0)   | 0 (0.0)   |       |
| MTND1P5        | rs16870060 | GG | 7 (63.6)  | 9 (81.8)  | 0.484 |
|                |            | GT | 3 (27.3)  | 2 (18.2)  |       |
|                |            | TT | 1 (9.1)   | 0 (0.0)   |       |
| ASH1L          | rs13373934 | AA | 11 (100)  | 11 (100)  | NA    |
|                |            | AG | 0 (0.0)   | 0 (0.0)   |       |
|                |            | GG | 0 (0.0)   | 0 (0.0)   |       |
| IL1A           | rs17561    | CC | 9 (81.8)  | 9 (81.8)  | 1.000 |
|                |            | CA | 2 (18.2)  | 2 (18.2)  |       |
|                |            | AA | 0 (0.0)   | 0 (0.0)   |       |
| IL1A           | rs1800587  | AA | 9 (81.8)  | 9 (81.8)  | 1.000 |
|                |            | AG | 2 (18.2)  | 2 (18.2)  |       |
|                |            | GG | 0 (0.0)   | 0 (0.0)   |       |
| IL1B           | rs1143627  | AA | 1 (9.1)   | 1 (9.1)   | 1.000 |
|                |            | AG | 6 (54.5)  | 6 (54.5)  |       |
|                |            | GG | 4 (36.4)  | 4 (36.4)  |       |
| IL1B           | rs16944    | GG | 1 (9.1)   | 1 (9.1)   | 1.000 |
|                |            | AG | 6 (54.5)  | 6 (54.5)  |       |
|                |            | AA | 4 (36.4)  | 4 (36.4)  |       |
| IL1B           | rs1143633  | GG | 3 (27.3)  | 2 (18.2)  | 0.842 |
|                |            | CG | 5 (45.5)  | 5 (45.5)  |       |
|                |            | CC | 3 (27.3)  | 4 (36.4)  |       |
| IL1B           | rs1143634  | GG | 10 (90.9) | 10 (90.9) | 1.000 |
|                |            | AG | 1 (9.1)   | 1 (9.1)   |       |
|                |            | AA | 0 (0.0)   | 0 (0.0)   |       |
| NIN (Intronic) | rs12883458 | TT | 6 (54.5)  | 9 (81.8)  | 0.361 |

|               |            |    |          |          |       |
|---------------|------------|----|----------|----------|-------|
|               |            | CT | 5 (45.5) | 2 (18.2) |       |
|               |            | CC | 0 (0.0)  | 0 (0.0)  |       |
| WNT5A (109Kb) | rs11925054 | GG | 11 (100) | 11 (100) | NA    |
|               |            | GT | 0 (0.0)  | 0 (0.0)  |       |
|               |            | TT | 0 (0.0)  | 0 (0.0)  |       |
| PTGFRN        | rs6589     | TT | 11 (100) | 11 (100) | NA    |
|               |            | CT | 0 (0.0)  | 0 (0.0)  |       |
|               |            | CC | 0 (0.0)  | 0 (0.0)  |       |
| TNS1          | rs1004814  | CC | 4 (36.4) | 3 (27.3) | 0.149 |
|               |            | CT | 6 (54.5) | 3 (27.3) |       |
|               |            | TT | 1 (9.1)  | 5 (45.5) |       |
| ANKRD28       | rs983600   | GG | 11 (100) | 11 (100) | NA    |
|               |            | AG | 0 (0.0)  | 0 (0.0)  |       |
|               |            | AA | 0 (0.0)  | 0 (0.0)  |       |
| C4orf21       | rs17669218 | GG | 11 (100) | 11 (100) | NA    |
|               |            | AG | 0 (0.0)  | 0 (0.0)  |       |
|               |            | AA | 0 (0.0)  | 0 (0.0)  |       |
| VAR5          | rs707926   | GG | 3 (27.3) | 5 (45.5) | 0.659 |
|               |            | AG | 7 (63.6) | 5 (45.5) |       |
|               |            | AA | 1 (9.1)  | 1 (9.1)  |       |
| PRRC2A        | rs1046080  | CC | 11 (100) | 11 (100) | NA    |
|               |            | AC | 0 (0.0)  | 0 (0.0)  |       |
|               |            | AA | 0 (0.0)  | 0 (0.0)  |       |
| DGKB          | rs1997040  | AA | 8 (72.7) | 9 (81.8) | 1.000 |
|               |            | AC | 3 (27.3) | 2 (18.2) |       |
|               |            | CC | 0 (0.0)  | 0 (0.0)  |       |
| RFC2          | rs1805395  | TT | 11 (100) | 11 (100) | NA    |
|               |            | TC | 0 (0.0)  | 0 (0.0)  |       |
|               |            | CC | 0 (0.0)  | 0 (0.0)  |       |
| MYOF          | rs11187393 | GG | 11 (100) | 11 (100) | NA    |
|               |            | AG | 0 (0.0)  | 0 (0.0)  |       |
|               |            | AA | 0 (0.0)  | 0 (0.0)  |       |
| OR11H6        | rs17277228 | TT | 7 (63.6) | 7 (63.6) | 1.000 |
|               |            | CT | 4 (36.4) | 4 (36.4) |       |
|               |            | CC | 0 (0.0)  | 0 (0.0)  |       |
| ZFYVE1        | rs12931    | CC | 5 (45.5) | 4 (36.4) | 0.904 |
|               |            | AC | 5 (45.5) | 6 (54.5) |       |

|                             |            |    |           |           |       |
|-----------------------------|------------|----|-----------|-----------|-------|
| ADPGK                       | rs9460     | AA | 1 (9.1)   | 1 (9.1)   | 1.000 |
|                             |            | GG | 10 (90.9) | 11 (100)  |       |
|                             |            | AG | 0 (0.0)   | 0 (0.0)   |       |
| TAF1C                       | rs3743642  | AA | 1 (9.1)   | 0 (0.0)   | 0.591 |
|                             |            | GG | 9 (81.8)  | 10 (90.9) |       |
|                             |            | AG | 1 (9.1)   | 1 (9.1)   |       |
| PSMD13                      | rs1045288  | AA | 1 (9.1)   | 0 (0.0)   | 0.357 |
|                             |            | AA | 9 (81.8)  | 8 (72.7)  |       |
|                             |            | AG | 1 (9.1)   | 3 (27.3)  |       |
| Vitamin D receptor<br>(VDR) | rs731236   | GG | 1 (9.1)   | 0 (0.0)   | 1.000 |
|                             |            | AA | 9 (81.8)  | 10 (90.9) |       |
|                             |            | AG | 2 (18.2)  | 1 (9.1)   |       |
| IL10                        | rs6667202  | GG | 0 (0.0)   | 0 (0.0)   | NA    |
|                             |            | CC | 11 (100)  | 11 (100)  |       |
|                             |            | AC | 0 (0.0)   | 0 (0.0)   |       |
| GLT6D1                      | rs1537415  | AA | 0 (0.0)   | 0 (0.0)   | 0.035 |
|                             |            | GG | 8 (72.7)  | 2 (18.2)  |       |
|                             |            | GC | 2 (18.2)  | 7 (63.6)  |       |
| ANRIL                       | rs1333048  | CC | 1 (9.1)   | 2 (18.2)  | 0.867 |
|                             |            | AA | 4 (36.4)  | 3 (27.3)  |       |
|                             |            | AC | 3 (27.3)  | 4 (36.4)  |       |
| VDR                         | rs10735810 | CC | 4 (36.4)  | 4 (36.4)  | 0.170 |
|                             |            | CC | 4 (36.4)  | 3 (27.3)  |       |
|                             |            | AC | 3 (27.3)  | 7 (63.6)  |       |
| TLR1                        | rs5743611  | AA | 4 (36.4)  | 1 (9.1)   | NA    |
|                             |            | CC | 11 (100)  | 11 (100)  |       |
|                             |            | CG | 0 (0.0)   | 0 (0.0)   |       |
| IFI16                       | rs6940     | GG | 0 (0.0)   | 0 (0.0)   | 0.584 |
|                             |            | AA | 6 (54.5)  | 7 (63.6)  |       |
|                             |            | AT | 4 (36.4)  | 4 (36.4)  |       |
| IFI17                       | rs1057028  | TT | 1 (9.1)   | 0 (0.0)   | 0.580 |
|                             |            | TT | 5 (45.5)  | 5 (45.5)  |       |
|                             |            | AT | 5 (45.5)  | 6 (54.5)  |       |
| DEFB1                       | rs1800972  | AA | 1 (9.1)   | 0 (0.0)   | 1.000 |
|                             |            | GG | 8 (72.7)  | 7 (63.6)  |       |
|                             |            | CG | 3 (27.3)  | 4 (36.4)  |       |
|                             |            | CC | 0 (0.0)   | 0 (0.0)   |       |

|       |           |    |          |          |       |
|-------|-----------|----|----------|----------|-------|
| DEFB1 | rs11362   | CC | 3 (27.3) | 4 (36.4) | 0.540 |
|       |           | CT | 5 (45.5) | 6 (54.5) |       |
|       |           | TT | 3 (27.3) | 1 (9.1)  |       |
| LTF   | rs1126478 | TT | 7 (63.6) | 4 (36.4) | 0.231 |
|       |           | CT | 4 (36.4) | 5 (45.5) |       |
|       |           | CC | 0 (0.0)  | 2 (18.2) |       |
| LTF   | rs1126477 | CC | 1 (9.1)  | 6 (54.5) | 0.068 |
|       |           | CT | 7 (63.6) | 3 (27.3) |       |
|       |           | TT | 3 (27.3) | 2 (18.2) |       |

---

<sup>a</sup> Chi-squared test

<sup>b</sup> N (%)
