# Supplementary material for: Comprehensive Analysis of Risk Factors for Periodontitis Focusing on the Saliva Microbiome and Polymorphism
Source: MDPI journal article supplement (doi:10.3390/ijerph18126430), 2021-06-14
Supplement: s1 [file s1]

Figure S1. Species richness estimated by Shannon index (a), Simpson's index (b), Chao1 (c), and abundance-based coverage estimator (ACE) (d) based on operational taxonomic unit (OTU) abundance for periodontitis and control groups.
